essential for clarifying this relationship. Aside from the distance of the residence from the power lines, the assessments should take into account the height of towers, distance between phases, ordering of phases, and average (mean) load on the power line for each year a study subject had lived in the house.

## Funding

This work was supported by the National Natural Science Foundation of China [grant numbers: 81573109].

## References

- Gervasi F, Murtas R, Decarli A *et al.* Residential distance from high-voltage overhead power lines and risk of Alzheimer's dementia and Parkinson's disease: a population-based case-control study in a metropolitan area of Northern Italy. *Int J Epidemiol* 2019;48:1949–57.
- Santibanez M, Bolumar F, Garcia AM. Occupational risk factors in Alzheimer's disease: a review assessing the quality of published epidemiological studies. *Occup Environ Med* 2007;64:723–32.
- Hayden KM, Norton MC, Darcey D *et al.*; For the Cache County Study Investigators. Occupational exposure to pesticides increases the risk of incident AD: the Cache County study. *Neurology* 2010;74:1524–30.
- Gunnarsson LG, Bodin L. Occupational exposures and neurodegenerative diseases—a systematic literature review and meta-analyses. *Int J Environ Res Public Health* 2019;16:337–54.
- Peters S, Reid A, Fritsch L *et al.* Long-term effects of aluminium dust inhalation. *Occup Environ Med* 2013;70:864–68.
- Mee T, Whatmough P, Broad L *et al.* Occupational exposure of UK adults to extremely low frequency magnetic fields. *Occup Environ Med* 2009;66:619–27.
- Bowman JD, Touchstone JA, Yost MG. A population-based job exposure matrix for power-frequency magnetic fields. *J Occup Environ Hyg* 2007;4:715–28.
- Yitzhak NM, Hareuveny R, Kandel S *et al.* Time dependence of 50 Hz magnetic fields in apartment buildings with indoor transformer stations. *Radiat Prot Dosimetry* 2012;149:191–95.
- Ilonen K, Markkanen A, Mezei G *et al.* Indoor transformer stations as predictors of residential ELF magnetic field exposure. *Bioelectromagnetics* 2008;29:213–18.
- Roosli M, Jenni D, Kheifets L *et al.* Extremely low frequency magnetic field measurements in buildings with transformer stations in Switzerland. *Sci Total Environ* 2011;409:3364–69.
- Sperling RA, Aisen PS, Beckett LA *et al.* Toward defining the pre-clinical stages of Alzheimer's disease: recommendations from the National Institute on Aging-Alzheimer's Association workgroups on diagnostic guidelines for Alzheimer's disease. *Alzheimers Dement* 2011;7:280–92.

## Response to: Residence near power lines and risk of Alzheimer's dementia and Parkinson's disease

Federico Gervasi , Rossella Murtas, Adriano Decarli and Antonio Giampiero Russo  \*

Epidemiology Unit, Agency for Health Protection of Milan, Corso Italia 19, 20122 Milan, Italy

\*Corresponding author. Epidemiology Unit, Agency for Health Protection of Milan, Corso Italia 19, 20122 Milan, Italy. E-mail: agrusso@ats-milano.it

International Journal of Epidemiology, 2020, 701–702

doi: 10.1093/ije/dyaa024

Advance Access Publication Date: 24 February 2020

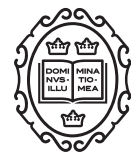

We thank Su *et al.* for their interest in our recent article,<sup>1</sup> which describes the first Italian case-control study investigating the effect of living in proximity to high-voltage overhead power lines on the risk of Alzheimer's dementia (AD) and Parkinson's disease (PD). Su *et al.* highlighted three specific points: (i) the role of work-related co-exposures associated with AD or PD, but not considered in our study; (ii) occupational and other exposures to extremely low-frequency magnetic fields (ELF-MFs), which have not been considered; and (iii) the short time window of the study.

The population basis of this study derives from an entire data warehouse gathered for public health purposes, which

offers a comprehensive and unbiased picture of the health status of 3.4 million people.<sup>2</sup> Data are nevertheless not collected for this specific study, for which additional information (such as the job of each resident) would have certainly been useful. We took advantage of the power of the population-based data, at the same time controlling for confounding as far as possible. To adjust for other potential confounders, matching has been performed not only by gender and year of birth but also by municipality (194 of them have been considered). The fundamental characteristics of each subject have thus been taken into account, as well as the specificity of each administrative division. This is related to geographical, demographic and socioeconomic

factors and environmental exposures, including production activities that have a major impact on the life of residents and make the municipality committed to a particular production sector (agriculture, industry etc.). Therefore, despite having no information about the individual jobs of subjects, efforts have been made to create sets of cases and controls that are comparable in terms of confounders.

In the original paper, we recognized as limitations of the study the lack of a quantitative estimate of ELF-MF, as well as the short time window which is limited by the availability of data (computerized from 2011). It is believed that the pathogenetic mechanisms of AD and PD start at least 10 years before diagnosis of AD<sup>3</sup> and about 5 years before diagnosis of PD.<sup>4</sup> Bearing this in mind, a case-control design was adopted because a longitudinal approach would have been pointless: it was actually impossible to establish the exposure time, which is essential in cohort studies and which, in this case, would be the length of time each subject had resided in the same dwelling. The growth of the datasets from 2017 onwards will allow the lengths of time needed to build up informative cohorts in several years (earlier for PD).

In conclusion, further developments that are not fully available now, such as the estimate of the magnetic field based on the current load and the structural characteristics of the power lines, and the collection of information about the jobs of subjects by means of questionnaires, will require specific studies and additional resources.

## References

1. Gervasi F, Murtas R, Decarli A, Russo AG. Residential distance from high-voltage overhead power lines and risk of Alzheimer's dementia and Parkinson's disease: a population-based case-control study in a metropolitan area of northern Italy. *Int J Epidemiol* 2019;48:1949–57.
2. Epidemiology Unit, Agency for Health Protection of Milan. *Popolazione Demografia*. [Population Demography]. [https://portale.ats-milano.it/salute/stato\\_salute.php?popolazione](https://portale.ats-milano.it/salute/stato_salute.php?popolazione) (5 December 2019, date last accessed).
3. Sperling RA, Aisen PS, Beckett LA *et al*. Toward defining the pre-clinical stages of Alzheimer's disease: recommendations from the National Institute on Aging-Alzheimer's Association workgroups on diagnostic guidelines for Alzheimer's disease. *Alzheimers Dement* 2011;7:280–92.
4. Fearnley JM, Lees AJ. Ageing and Parkinson's disease: substantia nigra regional selectivity. *Brain* 1991;114:2283–301.
